# Supplementary material
Source: PubMed Central journal article supplement (PMC5444163)
Supplement: AAC.02486-16_zac006176235s1.pdf [file AAC.02486-16_zac006176235s1.pdf]

**Supplemental Table S1:** Genetic profile of the three MRSA strains used in the experiments.

| Strain   | Biofilm production* (1) | Clonal Complex (2) | $\delta$ -hemolysis (3) |
|----------|-------------------------|--------------------|-------------------------|
| MRSA-196 | 0.590                   | CC5                | Negative                |
| MRSA-572 | 0.588                   | CC5                | Negative                |
| MRSA-277 | 0.686                   | CC5                | Negative                |

\*Positive control value = 0.530; negative control value = 0.005.

The methodology used for the studies of strains genetic profiles can be found in:

(1) Danese PN, Pratt LA, Dove SL and Kolter R: The outer membrane protein, antigen-43, mediates cell-to-cell interactions within *Escherichia coli* biofilms. *Mol Microbiol* 2000; 37: 424.

(2) Kadlec, K., Ehricht, R., Monecke, S., Steinacker, U., Kaspar, H., Mankertz, J and Schwarz, S. (2009) Diversity of antimicrobial resistance pheno- and genotypes of methicillin-resistant *Staphylococcus aureus* ST398 from diseased swine. *J. Antimicrob Chemother* 64, 1156-1164.

(3) Traber K., Novick R. 2006. A slipped-mispairing mutation in AgrA of laboratory strains and clinical isolates results in delayed activation of *agr* and failure to translate  $\delta$ - and  $\alpha$ -haemolysins. *Mol. Microbiol.* 59:1519–1530.
